# Supplementary material for: Quantifying nanoplastic-bound chemicals accumulated in Daphnia magna with a passive dosing method
Source: Royal Society of Chemistry journal article supplement (doi:10.1039/c7en00932a), 2018-01-01
Supplement: c7en00932a1.pdf [file c7en00932a1.pdf]

## Electronic Supplementary Information

### Quantifying Nanoplastic-Bound Chemicals Accumulated in *Daphnia*

#### *Magna* with a Passive Dosing Method

Ruifen Jiang,<sup>\*,a</sup> Wei Lin,<sup>b</sup> Yaxin Xiong,<sup>b</sup> Jiayi Wu,<sup>b</sup> Fang Zhu,<sup>b</sup> Lian-Jun Bao,<sup>a</sup>  
Jing You,<sup>a</sup> Gangfeng Ouyang,<sup>\*,b</sup> and Eddy Y. Zeng<sup>a</sup>

<sup>a</sup> School of Environment, Guangzhou Key Laboratory of Environmental Exposure and Health, and Guangdong Key Laboratory of Environmental Pollution and Health, Jinan University, Guangzhou 510632, China

<sup>b</sup> MOE Key Laboratory of Bioinorganic and Synthetic Chemistry, School of Chemistry, Sun Yat-sen University, Guangzhou 510275, China

\* Corresponding Author: Ruifen Jiang, [jiangrf5@jnu.edu.cn](mailto:jiangrf5@jnu.edu.cn); Gangfeng Ouyang, [cesoygf@mail.sysu.edu.cn](mailto:cesoygf@mail.sysu.edu.cn)

Number of pages: 9

Number of Figures: 6

Number of Tables: 2

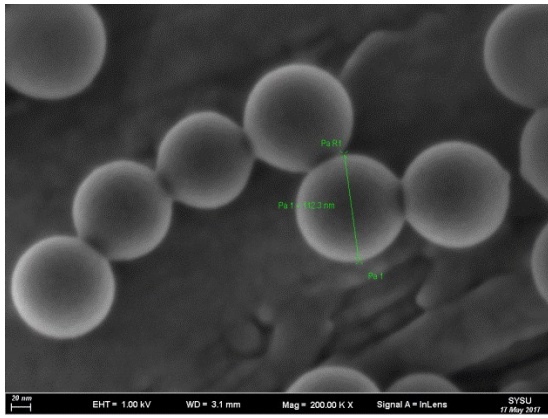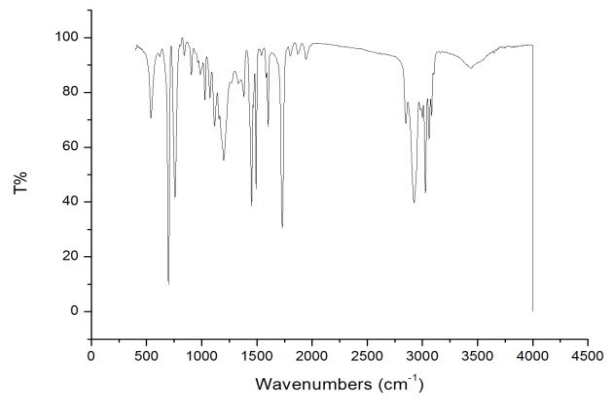

**Figure S1.** Scanning electron microscopy and FTIR spectra of the 100 nm PS.

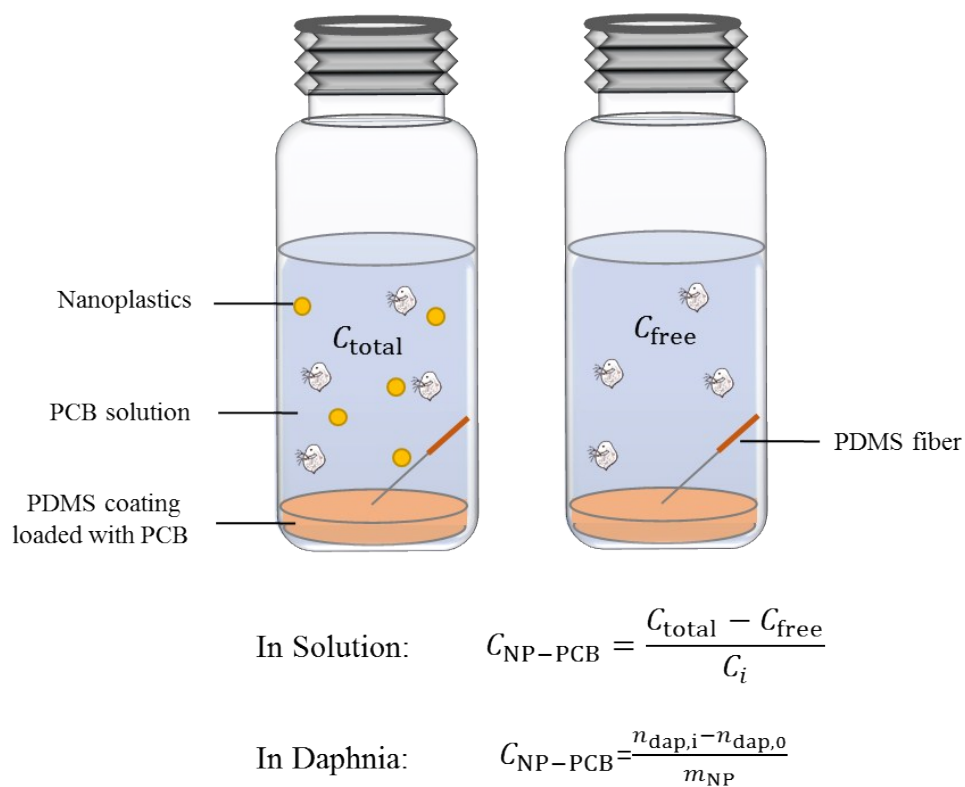

**Figure S2.** Schematic showing a typical passive dosing vial and exposure system. The left vial shows the exposure suspension with NP and the right one without NP.

Two equations show how to calculate the concentration of PCBs on the NP in solution and *Daphnia magna*.

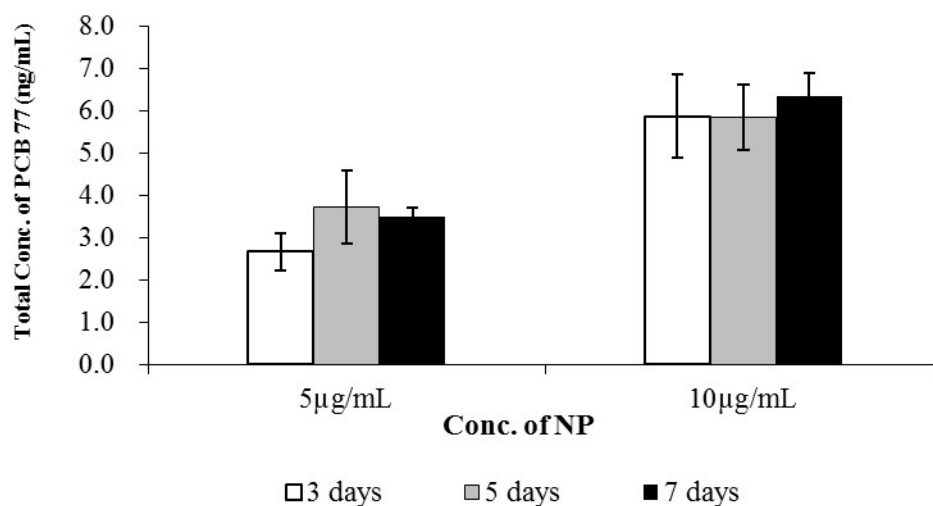

Figure S3. Comparison of the total concentration of PCB 77 in the exposure suspensions with NP concentration of 5 and 10 µg/mL after 3, 5 and 7 days exposure.

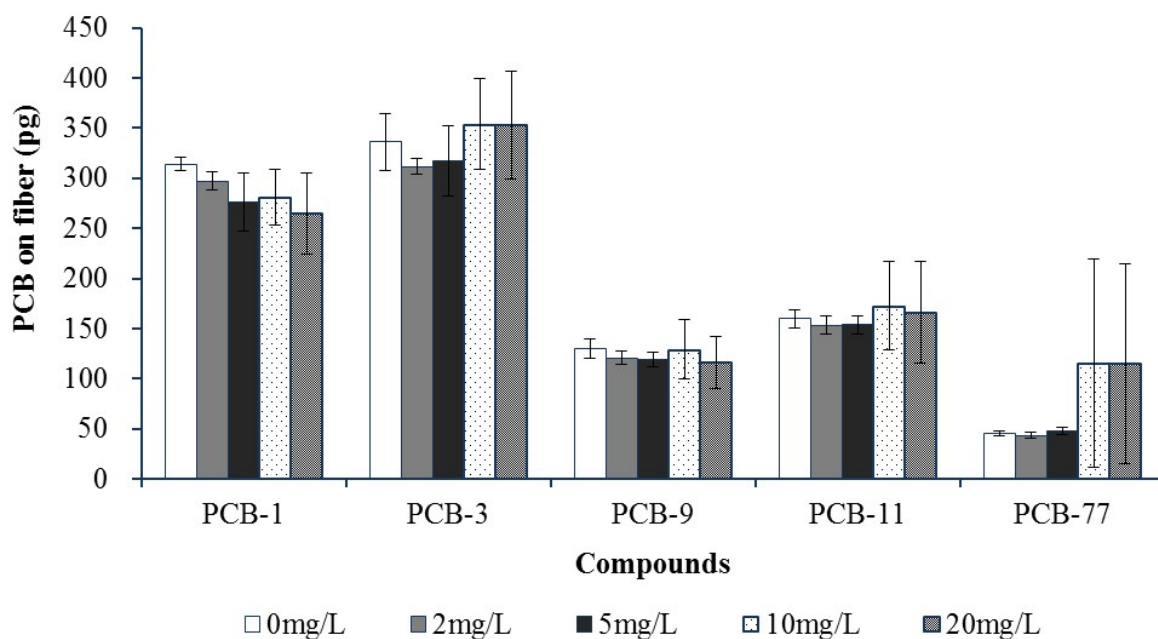

Figure S4. Accumulation of PCBs on PDMS fiber after 24 h exposure. One-way ANOVA test showed  $p > 0.05$  for all compounds.

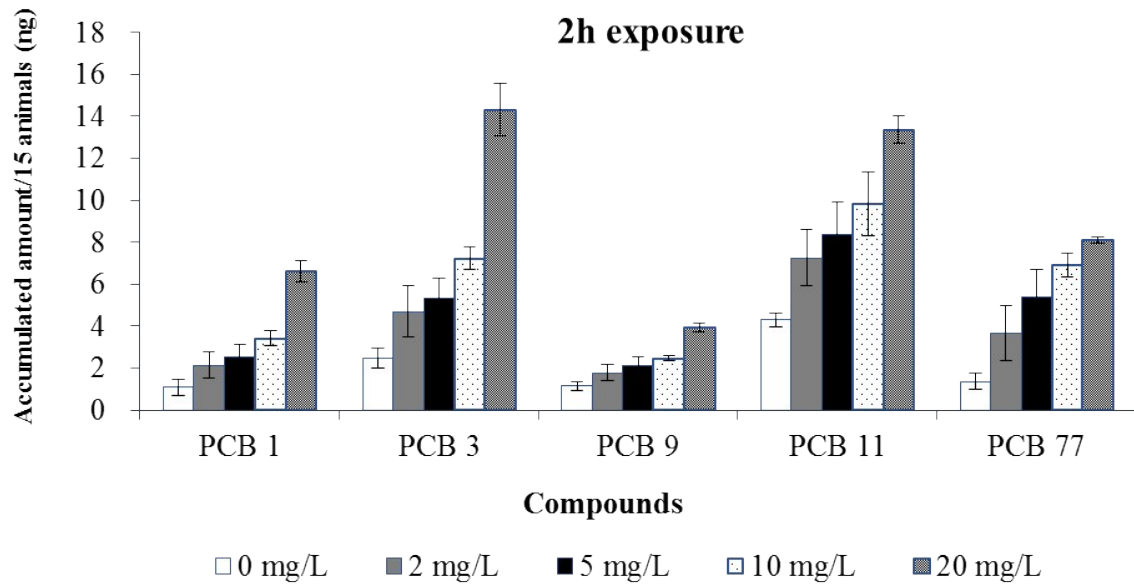

**Figure S5.** Accumulation of individual PCBs in daphnids with different concentrations of NP after 2 h exposure.

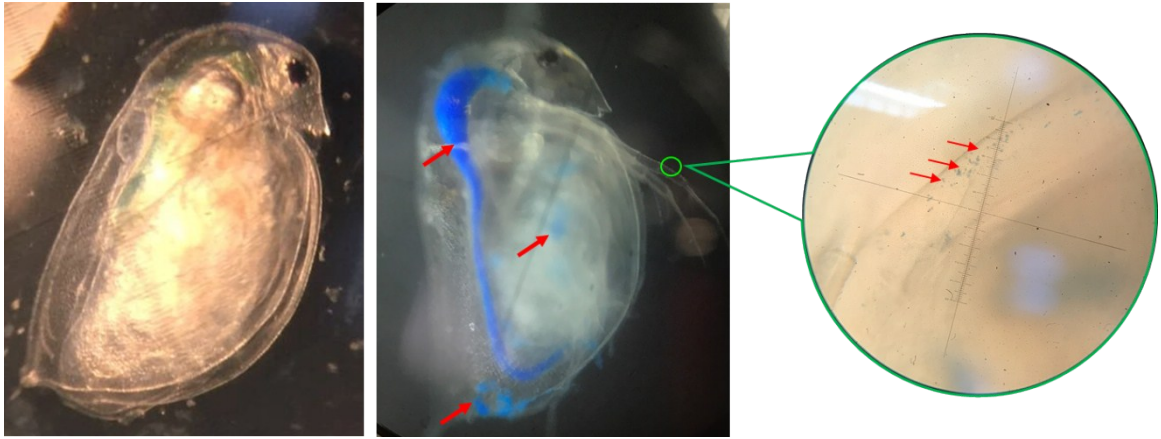

Figure S6. Comparison of the uptake of PS on *D.magna* in exposure group and control group.

**Table S1. Hydrodynamic diameter of 100 nm PS in different exposure conditions.**

| <b>Hydrodynamic diameter(nm)</b> | <b>Freshly spiked</b> | <b>Spiked for 5 days</b> | <b>After Daphnia exposure</b> |
|----------------------------------|-----------------------|--------------------------|-------------------------------|
| 100 nmNP                         | 205 ± 7               | 193 ± 4                  | 196 ± 4                       |
| 100 nmNP with PCBs               | 202 ± 5               | 195 ± 8                  | Not test                      |

**Table S2.** Ingested amount of NP at different exposure conditions.

| Ingested NP<br>(ng) | 2-h    |        |         |         | 24-h   |        |         |         |
|---------------------|--------|--------|---------|---------|--------|--------|---------|---------|
|                     | 2 mg/L | 5 mg/L | 10 mg/L | 20 mg/L | 2 mg/L | 5 mg/L | 10 mg/L | 20 mg/L |
| PCB-1               | 63     | 78     | 108     | 247     | 115    | 131    | 119     | 106     |
| PCB-3               | 71     | 80     | 116     | 261     | 69     | 128    | 132     | 113     |
| PCB-9               | 78     | 103    | 119     | 270     | 81     | 133    | 140     | 123     |
| PCB-11              | 66     | 87     | 112     | 222     | 105    | 99     | 102     | 132     |
| PCB-77              | 97     | 164    | 184     | 296     | 60     | 77     | 89      | 70      |
| Average (ng)        | 75     | 102    | 128     | 259     | 86     | 114    | 116     | 109     |
| RSD%                | 18     | 35     | 25      | 11      | 27     | 22     | 18      | 22      |
